# Supplementary material for: Node-Structured Integrative Gaussian Graphical Model Guided by Pathway Information
Source: Hindawi journal article supplement (doi:10.1155/2017/8520480), 2017-01-01
Supplement: f1 [file 8520480.f1.pdf]

# Supplementary material: Node-structured Integrative Gaussian Graphical Model Guided by Pathway Information

SungHwan Kim<sup>4</sup>, Jae-Hwan Jhong<sup>1</sup>, JungJun Lee<sup>1</sup>, Ja-Yong Koo<sup>1</sup>, ByungYong Lee<sup>3</sup>  
and SungWon Han<sup>2</sup>

<sup>1</sup>Department of Statistics, Korea University, Seoul, South Korea

<sup>2</sup>School of Industrial Management Engineering, Korea University, Seoul, South Korea

<sup>3</sup>Graduate School of Information Security, Korea University, Seoul, South Korea

<sup>4</sup>Department of Statistics, Keimyung University, Daegu, South Korea

February 20, 2017

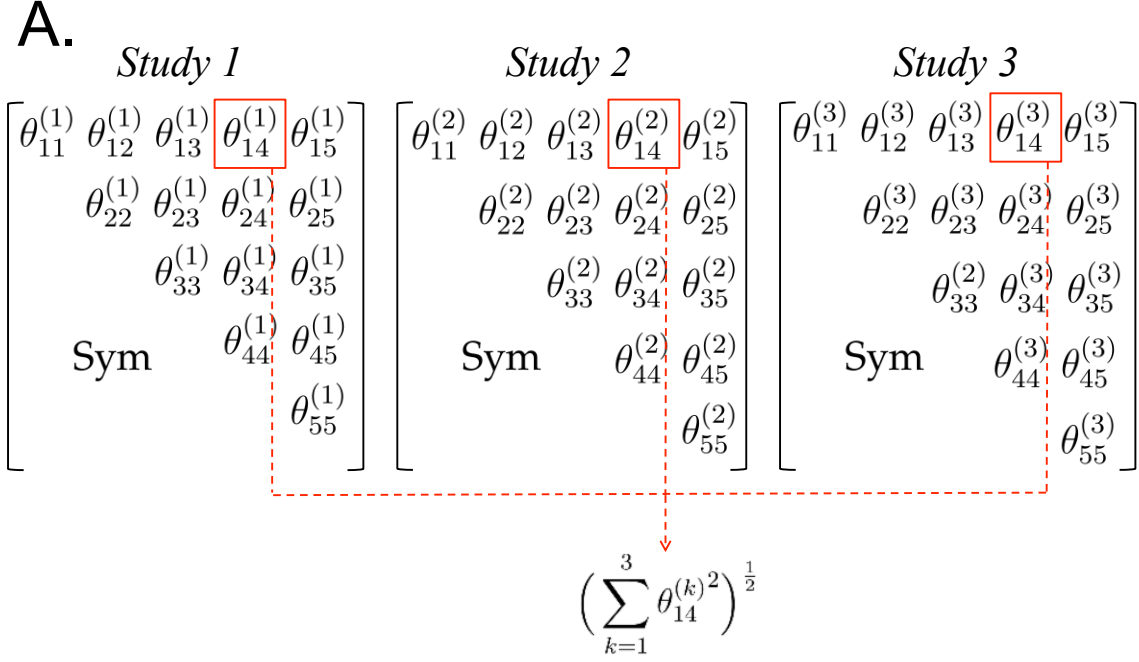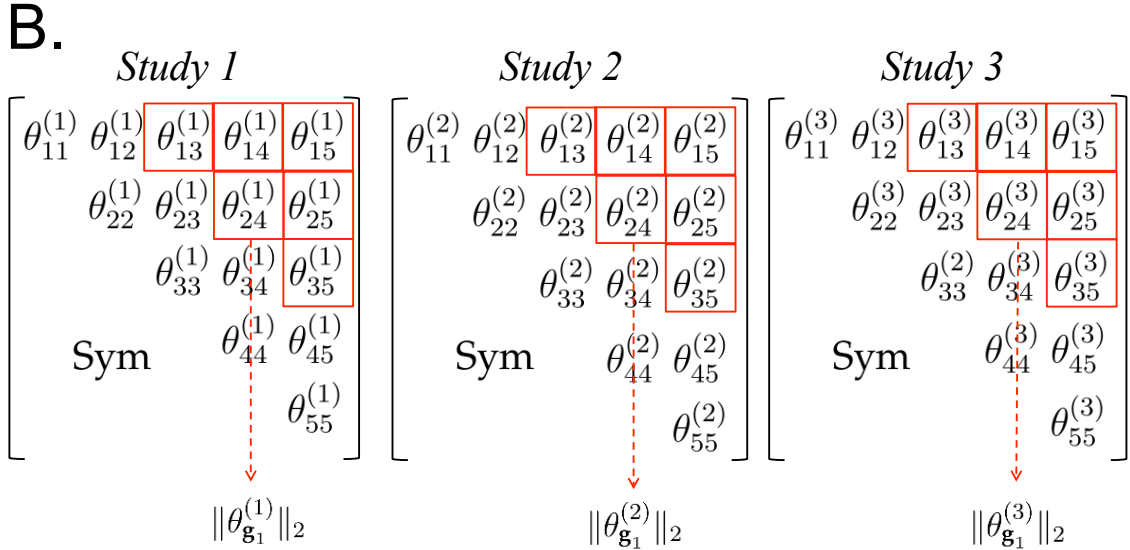

subject to  $\theta_{\mathbf{g}_1}^{(k)} = (\theta_{13}^{(k)}, \theta_{14}^{(k)}, \theta_{15}^{(k)}, \theta_{24}^{(k)}, \theta_{25}^{(k)}, \theta_{35}^{(k)})$

Figure 1: Shown are the examples of each group lasso regulating precision matrices of multiple studies - (A) Joint graphical lasso (JGL) integrates three elements across precision matrices introduced in Joint Gaussian graphical model (JGGL) / (B) six elements of modules  $\mathbf{g}_1$  that originates from three nodes in a pathway are simultaneously taken in  $\|\theta_{\mathbf{g}_1}^{(k)}\|_2$  for  $k = 1, 2$  and  $3$ .
